# Supplementary material for: Discovering Novel Alternaria solani Succinate Dehydrogenase Inhibitors by in Silico Modeling and Virtual Screening Strategies to Combat Early Blight
Source: PubMed Central journal article supplement (PMC5698277; doi:10.3389/fchem.2017.00100), 2017-11-17
Supplement: Presentation1.pdf [file Presentation1.pdf]

## *Supporting Information*

### Discovering Novel *Alternaria solani* Succinate Dehydrogenase Inhibitors by *In Silico* Modeling and Virtual Screening Strategies to Combat Early Blight

Sehrish Iftikhar<sup>1</sup>, Ahmad Ali Shahid<sup>1,2</sup>, Sobia Ahsan Halim<sup>3,\*</sup>, Jaap Wolters<sup>4</sup>, Vivianne G A A Vleeshouwers<sup>4</sup>, Ajmal Khan<sup>5,6,\*</sup>, Ahmed Al-Harrasi<sup>6</sup>, Shahbaz Ahmad<sup>1</sup>

<sup>1</sup>Institute of Agricultural Sciences, University of the Punjab, Lahore, Pakistan. <sup>2</sup>Center of Excellence in Molecular Biology, University of the Punjab, Lahore, Pakistan. <sup>3</sup>Department of Biochemistry, Kinnaird College for Women, 93-Jail Road, Lahore-Pakistan. <sup>4</sup>Wageningen UR Plant Breeding, Wageningen University and Research Center, Wageningen, The Netherlands. <sup>5</sup>Department of Chemistry, COMSATS Institute of Information Technology, Abbottabad-22060, Pakistan. <sup>6</sup>UoN Chair of Oman Medicinal Plants and Marine Products, University of Nizwa, Sultanate of Oman

\*Correspondence: Sobia Ahsan Halim, E-mail: [sobia.ahsan@kinnaird.edu.pk](mailto:sobia.ahsan@kinnaird.edu.pk) [sobiahal@gmail.com](mailto:sobiahal@gmail.com), Tel. Off: +(92) 42 99203781-84 (Ext 226), Ajmal Khan, email: [ajmalchemist@yahoo.com](mailto:ajmalchemist@yahoo.com)

#### Supplementary Data

##### Sequences of *A. solani* SDH subunits.

##### *A. solani* SDH subunit A

PVIDHEYDAIVVGAGGAGLRAAFGLAEAGFNTACISKLPTRSHTVAAQGGINAALGSM  
HEDDWRWHMYDTVKGSDWLGQDAIHMTREAPQS VIELENYGCPFSRTDDGKMYQ  
RAFGGQSQKYGKGGQAYRCCAAADRTGHALLHTLYGQSLRHNTKYFIEFFATDLIMED  
GVCKGVVAYNQEDGTIHRFIAKNTVLATGGYGRAYFSC TSAHTCTGDGMAMVARAGL  
PNQDLEFVQFHPTGIYGAGCLITEGSRGEGGYLLNSEGERFMERYAPTAKDLASRDVVS  
RSMTLEIREGRGVGPEKDH IYLQLSHLPAEVLHERLPGISETAAIFAGVDVTKQPIPVLP  
VHYNMGGIPTKYTGEVITQDAQGNDQVVPGLFACGEAASVSVHGANRLGANSLLDLIV  
FGRAVSHTIRDNFSPGQKADPVSADAGADSI VLDQIRTS DGPKSTAEIRLQMOKVMQT  
DVAVFRTQESLDEGVKKIHDVDADFANVGIKDRSMIWNSDLVETLELRNLLTCAVQTA  
ESAANRKESRG AHAREDFPDRDDEQWMKHTLSWQKKPHGETQLGYRKVVGTTLDEAE  
CKAVPPFKRTY

##### *A. solani* SDH subunits B (GenBank: AGS56260.1)

MASIRAFTRLATS DLVPVRPAVFSRGFASVNDVHAREPISKIAEKIAPDASRSPVPEKTS  
TVPEPEPSKDAKTKTFHIYRWNPDEPTSKPKMQSYTLDLNKTGPMMLDALIRIKNEVDP  
TLTFRRSCREGICGSCAMNIDGVNTLACLRIPTDTTKESRIYPLPHMYVVKDLVPDML  
FYKQYRSVKPYLQRSTAAPDGREFRQSKEDRKKLDGLYECILCACCSTSCPSYWWNQE  
EYLGPAVLLQSYRWIADSRDEKKAERQDALNNSMSLYRCRTILNCSRTCPKGLNPALAI  
AEIKKSMAFT

***A. solani* SDH subunits C (AGS56262.1)**

MASQRVFQLGLRRAAPGLRVQPVGRMVQRRLAA TEHASQSEAAEILAKQRINRPVSP  
HLAIYRPQITWYASSLNRTGITLSGSLYLFGIAYLIAPYTGWHMETQSMVATVAAWPAA  
AKAGLKAFYAFPPFFHSFNGLRHLSWDVGIGFKNQQVIRLGW

***A. solani* SDH subunits D (GenBank: AGS56264.1)**

MASVMRPGLLRQACPPAHASQRMLSTATATTSRPLAQQLRPAFQRSAVPKATRIAAFH  
ATQRTQILPPLPQKIIGTTNDPVPVDPDYAHGSYHWSFERIVSAGLIPLTIAPFAAGSLNP  
LTDSILCALLVVHSHIGFESCIIDYFPAKRVPKTRKAAMWALRAGTLTLGLALYSFETND  
VGITE

**Supplementary Figures and Tables**

Supplementary Figures

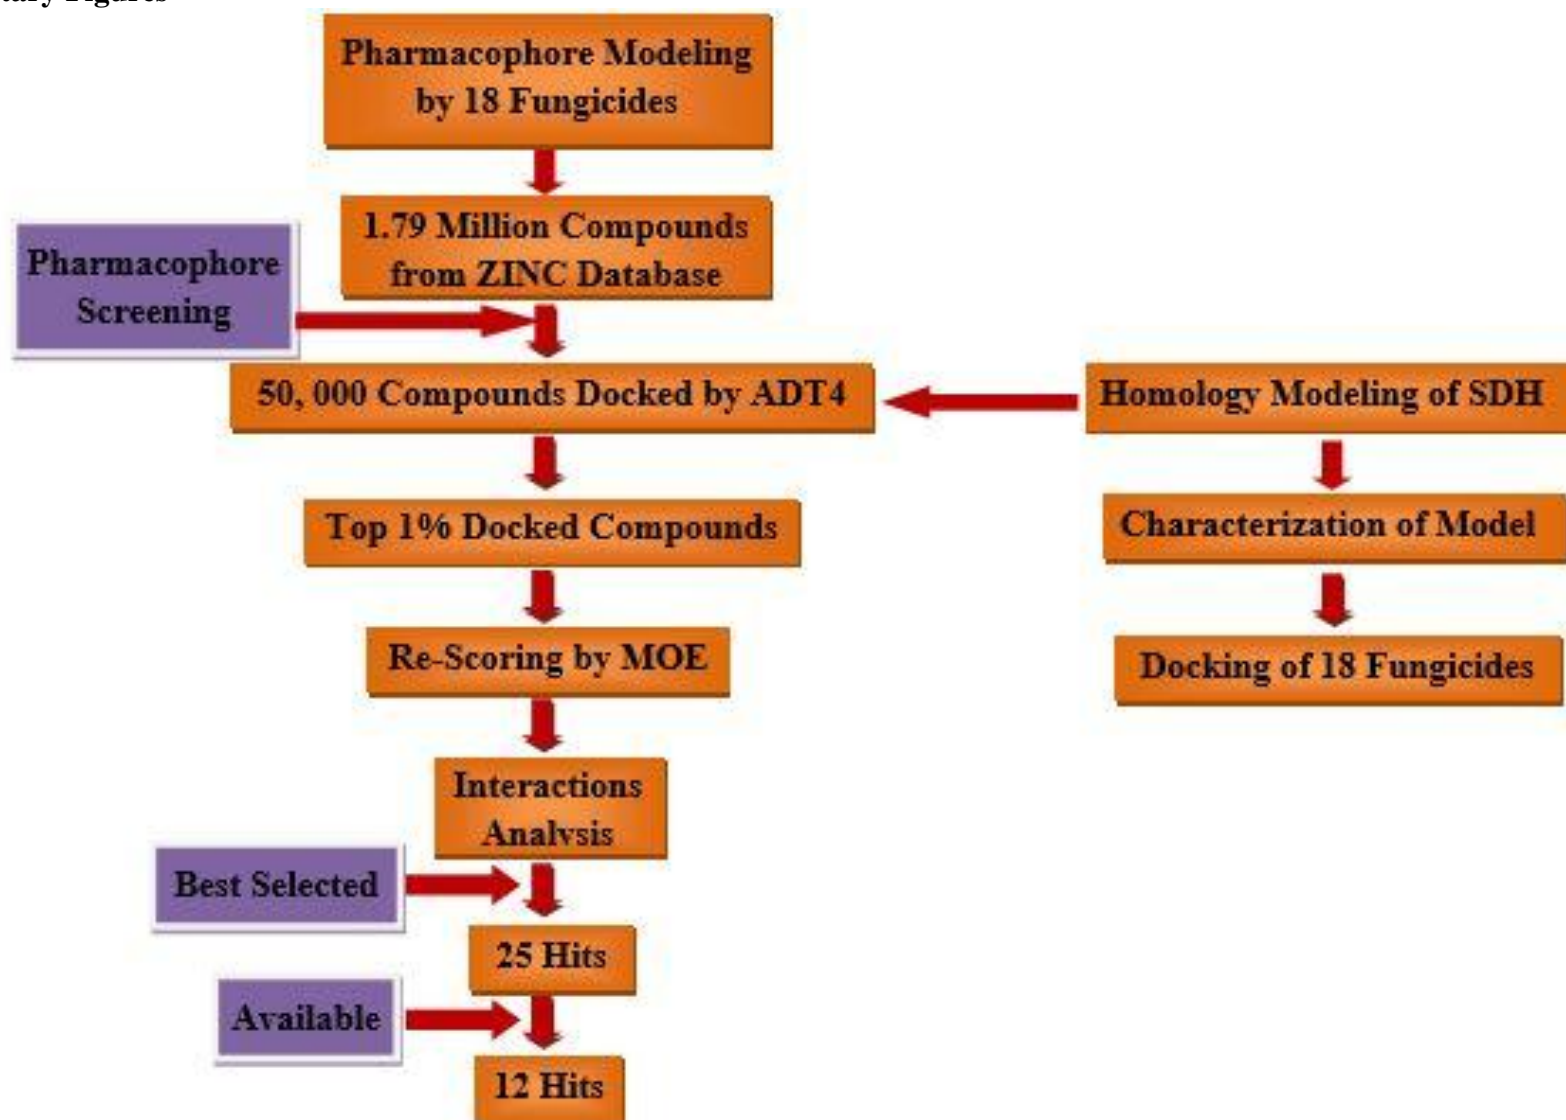

Supplementary Figure S1. Schematic presentation of Computational Work Flow

```

SDHA          -----PVIDHEYDAIWWGAGGAGLRAAFGLAEAGFNTACISKLPTRSHVA
1YQ3A        -STKVSDSISTQYPVVDHEFDVVVWAGGAGLRAAFGLSEAGFNTACVTCLFPTRSHVA
1ZOYA        SSAKVSDAISTQYPVVDHEFDVVVWAGGAGLRAAFGLSEAGFNTACVTCLFPTRSHVA
              **:***:***:*****:*****:*****:*****

SDHA          AQQGINAALGSMHEDDWRWHMYDTVKGSDWLGQDQAIHYMTREAPQSVIELENYGCPFSR
1YQ3A        AQQGINAALGNMEDDNRWHFYDTVKGSDWLGQDQAIHYMTEQAPAAVIELENYGMPFSR
1ZOYA        AQQGINAALGNMEEDNNRWHFYDTVKGSDWLGQDQAIHYMTEQAPASVVELENYGMPFSR
              *****_*_*:***:*****:*****:*****_*_*:***** ****

SDHA          TDDGKMYQRAFGGQSQKYGKGGQAYRCCAAADRTGHALLHTLYGQSLRHNTKYFIEFFAT
1YQ3A        TEEGKIYQRAFGGQSLQFGKGGQAHRCVADRTGHSLHTLYGRSLRYDTSYFVEYFAL
1ZOYA        TEDGKIYQRAFGGQSLKFGKGGQAHRCVADRTGHSLHTLYGRSLRYDTSYFVEYFAL
              *_*:***:*****_*_*:*****:***_*_*:*****:*****:***_*_*:***

SDHA          DLIMEDGVCKGVVAYNQEDGTIHRFIAKNTVLATGGYGRAYFSCTS AHTCTGDGMAMVAR
1YQ3A        DLLMENGECRGIALCIEDGTIHRFRAKNTVIATGGYGRYFSCTS AHTSTGDGTAMVTR
1ZOYA        DLLMENGECRGIALCIEDGSIHRIRARNTVVATGGYGRYFSCTS AHTSTGDGTAMVTR
              **:*_*:***_*_*:***:***:***:*****:*****_*_*:*** **:*_*

SDHA          AGLPNQDLEFVQFHPTGIYAGCLITEGSRGEGYLLNSEGERFMERYAPTAKDLASRDV
1YQ3A        AGLPCQDLEFVQFHPTGIYAGCLITEGCRGEGGILINSQGERFMERYAPVAKDLASRDV
1ZOYA        AGLPCQDLEFVQFHPTGIYAGCLITEGCRGEGGILINSQGERFMERYAPVAKDLASRDV
              *****_*****:*****_*_*:*****_*_*:*****_*_*:*****

SDHA          VRSMTLEIREGRGVPEKDHVYLLQSHLPAEVLHERLPGISETAAIFAGVDVTKEPIPV
1YQ3A        VRSMTIEIREGRGCGPEKDHVYLLQSHLPPQQLATRLPGISETAMIFAGVDVTKEPIPV
1ZOYA        VRSMTLEIREGRGCGPEKDHVYLLQSHLPEQLAVRLPGISETAMIFAGVDVTKEPIPV
              *****:*****_*****:*** **_*_*:*****_*****:***

SDHA          LPTVHYNMGGIPTKYTGEVITQDAQGNDQVVPGLFACGEAASVSVHGANRLGANSLLDLI
1YQ3A        LPTVHYNMGGIPTNYKGVITH-VNGEDKVVVPGLYACGEAASASVHGANRLGANSLLDLV
1ZOYA        LPTVHYNMGGIPTNYKGVLRH-VNGQDQVVPGLYACGEAACASVHGANRLGANSLLDLV
              *****:***_*_*:***_*_*:***_*_*:*****:*****_*_*:*****:*****

SDHA          VFGRAVSHIRDNFSPGQKADPVSAADAGADSI SVLDQIRTS DGPKSTAEIRLQMOKVMQT
1YQ3A        VFGRAVSHIRDNFSPGQKADPVSAADAGADSI SVLDQIRTS DGPKSTAEIRLQMOKVMQT
1ZOYA        VFGRAVSHIRDNFSPGQKADPVSAADAGADSI SVLDQIRTS DGPKSTAEIRLQMOKVMQT
              *****_*_*:***_*_*:***_*_*:***_*_*:***_*_*:***_*_*:***_*_*:***_*_*:***_*_*

SDHA          DVAVFRTQESLDEGVKKIHDVDADFANVGIKDRSMIWNNDLVETLELRNLLTCAVQTAE
1YQ3A        HAAVFRTGSILQEGCEKLSQIYRDLAHLKTFDRGIWNNDLVETLELRNLLTCAVQTAE
1ZOYA        HAAVFRVGSVLQEGCEKILRLYDGLQHLKTFDRGMWNNDLVETLELRNLLTCAVQTAE
              ..****. *_**_*_*:***_*_*:***_*_*:***_*_*:***_*_*:***_*_*:***_*_*

SDHA          AANRKE SRGAHAREDFPDRDD-----EQW MKHTLSWQKKPHGETQLGY
1YQ3A        AEARKESRGAHAREDYKLRIDEFDYSKPLQGQQKRPFEHWRKHTLSYVDVKSGKVTLKY
1ZOYA        AEARKESRGAHAREDFKERVDEYDYSKPIQGGQQKPFQEHWRKHTLSYVDVKTGKVSLEY
              * *****_*_*:***_*_*:*****_*_*:*****_*_*:*****_*_*

SDHA          RKWVGTTLDEAECKAVPPFKRTY
1YQ3A        RPVIDRTLNEEDCSSVPPAIRSY
1ZOYA        RPVIDKTLNEADCATVPPAIRSY
              *_*_*:***_*_*:***_*_*:***_*_*

```

Supplementary Figure S2 (A). Multiple sequence alignment of SDHA.

```

SDHB      MASIRAFTRLATSDLVPRPAVFSRGFASVNDVHAREPIISKIAEKIAPDASRSPVPESKT
1YQ3B     -----
1ZOYB     -----

SDHB      STVPEPEPSKDAKTKTFHIYRWNPDPTSKPKMQSYTLDLNKTGPMMLDALIRIKNEVDP
1YQ3B     ---AQTAAAATSRIKKFSIYRWDPDKPGDKPRMQTYEVDLNKCGPMVLDALIKIKNELDS
1ZOYB     ---AQTAAATAPRIKKFAIYRWDPDKTGDKPHMQTYEIDLNNCGPMVLDALIKIKNEIDS
          :   :   : *.* *****:**. .**:**:* :***: ***:*****:***:*

SDHB      TLTFRRSREGICGSCAMNIDGVNTLACLRIPTDTTKESRIYPLPHMYVVKDLVPMTL
1YQ3B     TLTFRRSREGICGSCAMNIAGGNTLACTKKIDPDLKTTKIYPLPHMYVVKDLVPLSN
1ZOYB     TLTFRRSREGICGSCAMNINGGNTLACTRRIDTNLDKVKIYPLPHMYVIKDLVPLSN
          *****:***:***: * ***** :* : * ::*****:*****:;;

SDHB      FYKQYRSVKPYLQRSTAAPDGR-EFRQSKEDRKKLDGLYECILCACCSTSCPSYWNQEE
1YQ3B     FYAQYKSIIEPYLKKKDESKQKQYLQSIEDRQKLDGLYECILCACCSTSCPSYWNGDK
1ZOYB     FYAQYKSIIEPYLKKKDESQEGKQYLQSIEREKLDGLYECILCACCSTSCPSYWNGDK
          ** *:*:***:.. : :*: :: ** *:*:*****:*****:*****:;;

SDHB      YLGPAVLLQSYRWIADSRDEKKAERQDALNNSMSLYRCRTILNCSRTCCKGLNPALIAIE
1YQ3B     YLGPAVLMQAYRWMIDSRDDYTEERLAQLQDPFSLYRCHTIMNCTRTCCKGLNPGKAIIE
1ZOYB     YLGPAVLMQAYRWMIDSRDDFTEERLAKLQDPFSLYRCHTIMNCTGTCPKGLNPGKAIIE
          *****:***:***: *****: . ** *:: :*****:***:**: ***** . ****

SDHB      IKKSMAFT-----
1YQ3B     IKKMMATYKEKAAAA
1ZOYB     IKKMMATYKEKKASV
          *** **

```

Supplementary Figure S2 (B). Multiple sequence alignment of SDHB.

```

SDHC      MASQRVFLGLRRAAAPGLRVQPVGRMVQRRLAATEHASQSEAAEILAKQRINRPVSPHL
1YQ3C     -----MATTAKEEMARFWEKNTKS-----SRPLSPHI
1ZOYC     -----LGT TAKEEMERFWKNLGS-----NRPLSPHI
          :   ... * :  : * .***:***:

SDHC      AIYRPQITWYASSLNIRITGITLSGSLYLFGIAYLIAPYTGWHMETQSMVATVAAWPAAAK
1YQ3C     SIYKWSLPMAMSIHRGTGVALSLGVSLFSLAALLLPEQ---FPHYVAVVKSLSLSPALI
1ZOYC     TIYRWSLPMAMSIHRGTGIALSAGVSLFGLSALLLPGN---FESHLELVKSLCLGPTLI
          :**: .: * :* **:**. : **.: * : * :   : .. . :

SDHC      AGLKAFYAFPPFFHSFNGLRHLSWVDVIGFKNQQVIRLW-----
1YQ3C     YSAKFALVFPLSYHTWNGIRHLVWDMGKGFKLSQVEQSGVVVILITLLSSAGIAAIS
1ZOYC     YTAKFGIVFPLMYHTWNGIRHLIWDLGKGLTIPQLTQSGVVVILITLVSSVGLAAM-
          * .**: :*:**:*** **:* *.. * : : *

```

Supplementary Figure S2 (C). Multiple sequence alignment of SDHC.

```

SDHD      MASVMRPGLLRQACPPAHASQRMLSTATATTSRPLAQQLRPAFQRSVAVPKATRIAAFHAT
1ZOYD     -----
1YQ3D     -----

SDHD      QRTQILPPLPQKIIIGTTNDPVPVDPDYAHGSYHWSFERIVSAGLIPLTIAPFAAGSLNP
1ZOYD     -----ASSKAASLHWGTGERVSVLLLGLLPAAYLN--PCS
1YQ3D     -----GSSKAASLHWTSERAVSALLLGLLPAAYLY--PGP
              . . * ** : ** ** . * : * * :

SDHD      LTDSILCALLVHSHIGFESCIIDYFPAKRVPKTRKAAMWALRAGTLTLGLALYSFETND
1ZOYD     AMDYSLAAALTLHGHWGIGQVVDYVRGDALQKAAKAGLLALSFTFAG---LCYFNYHD
1YQ3D     AVDYSLAAALTLHGHWGLGQVITDYVHGDTPIKVANTGLYVLSAITFTG---LCYFNYYD
              * * . * * . : * . * * : . : ** . . . * . : : : . * * * : : * * : *

SDHD      VGITE-----
1ZOYD     VGICKAVAMLWKL
1YQ3D     VGICKAVAMLWSI
              *** ;

```

**Supplementary Figure S2 (D).** Multiple sequence alignment of SDHD.

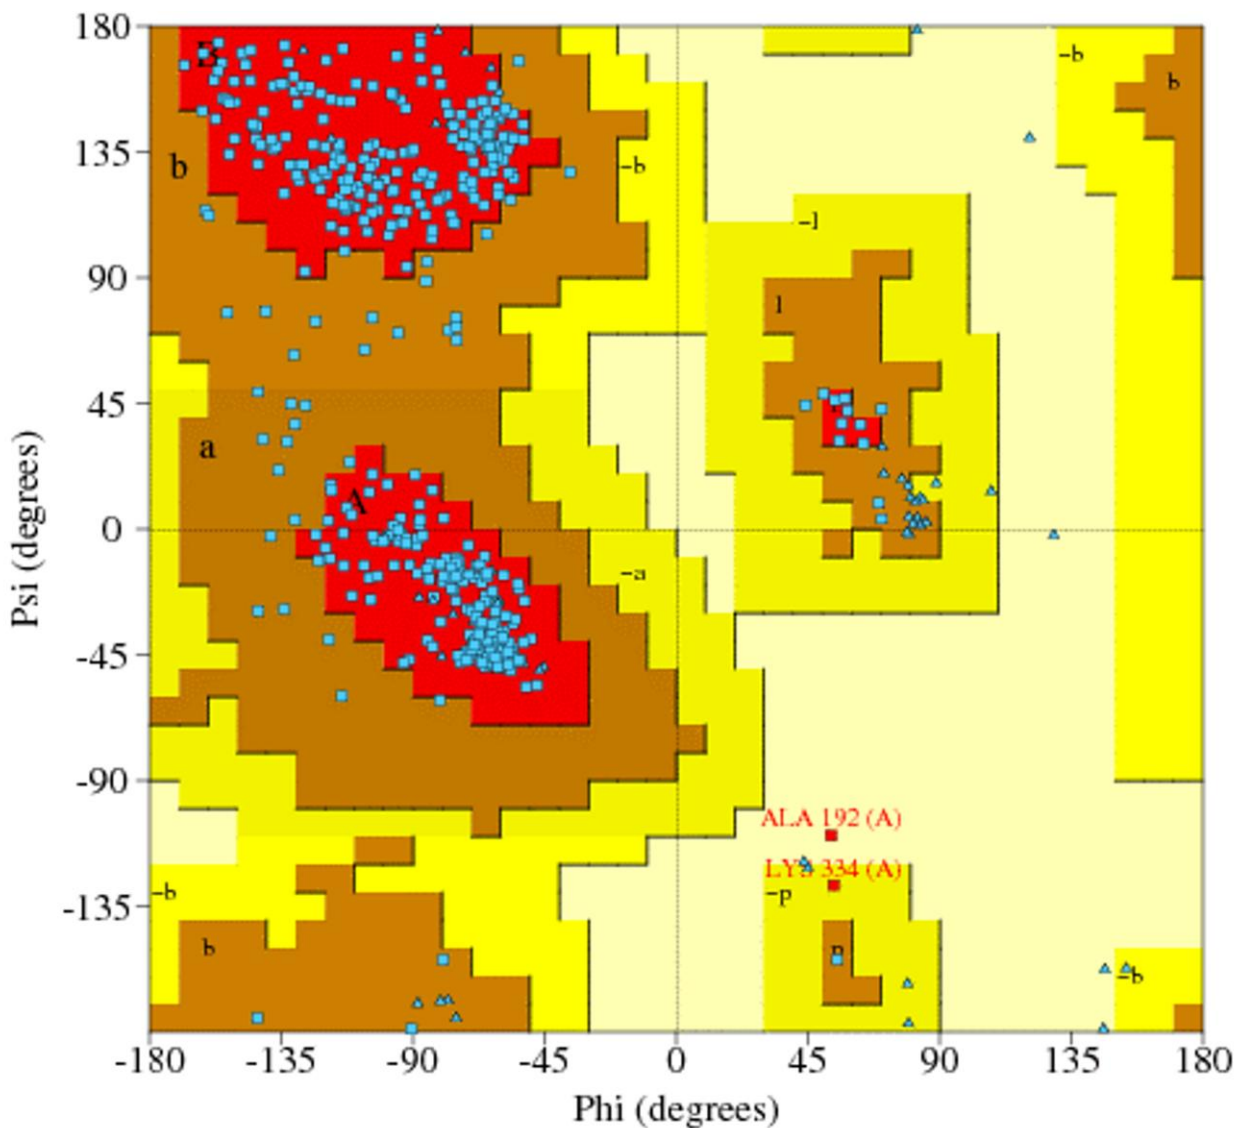

### Ramachandran Plot statistics

|                                          | No. of residues | %-tage |
|------------------------------------------|-----------------|--------|
| Most favored regions [A, B, L]           | 471             | 91.3%  |
| Additional allowed regions [a,b,l,p]     | 43              | 8.3%   |
| Generously allowed regions [~a,~b,~l,~p] | 1               | 0.2%   |
| Disallowed regions [XX]                  | 1               | 0.2%*  |
| Non-glycine and non-proline residues     | 516             | 100.0% |
| End-residues (excl. Gly and Pro)         | 1               |        |
| Glycine residues                         | 61              |        |
| Proline residues                         | 22              |        |
| Total number of residues                 | 600             |        |

**Supplementary Figure S3 (A).** Ramachandran plot of Subunit A

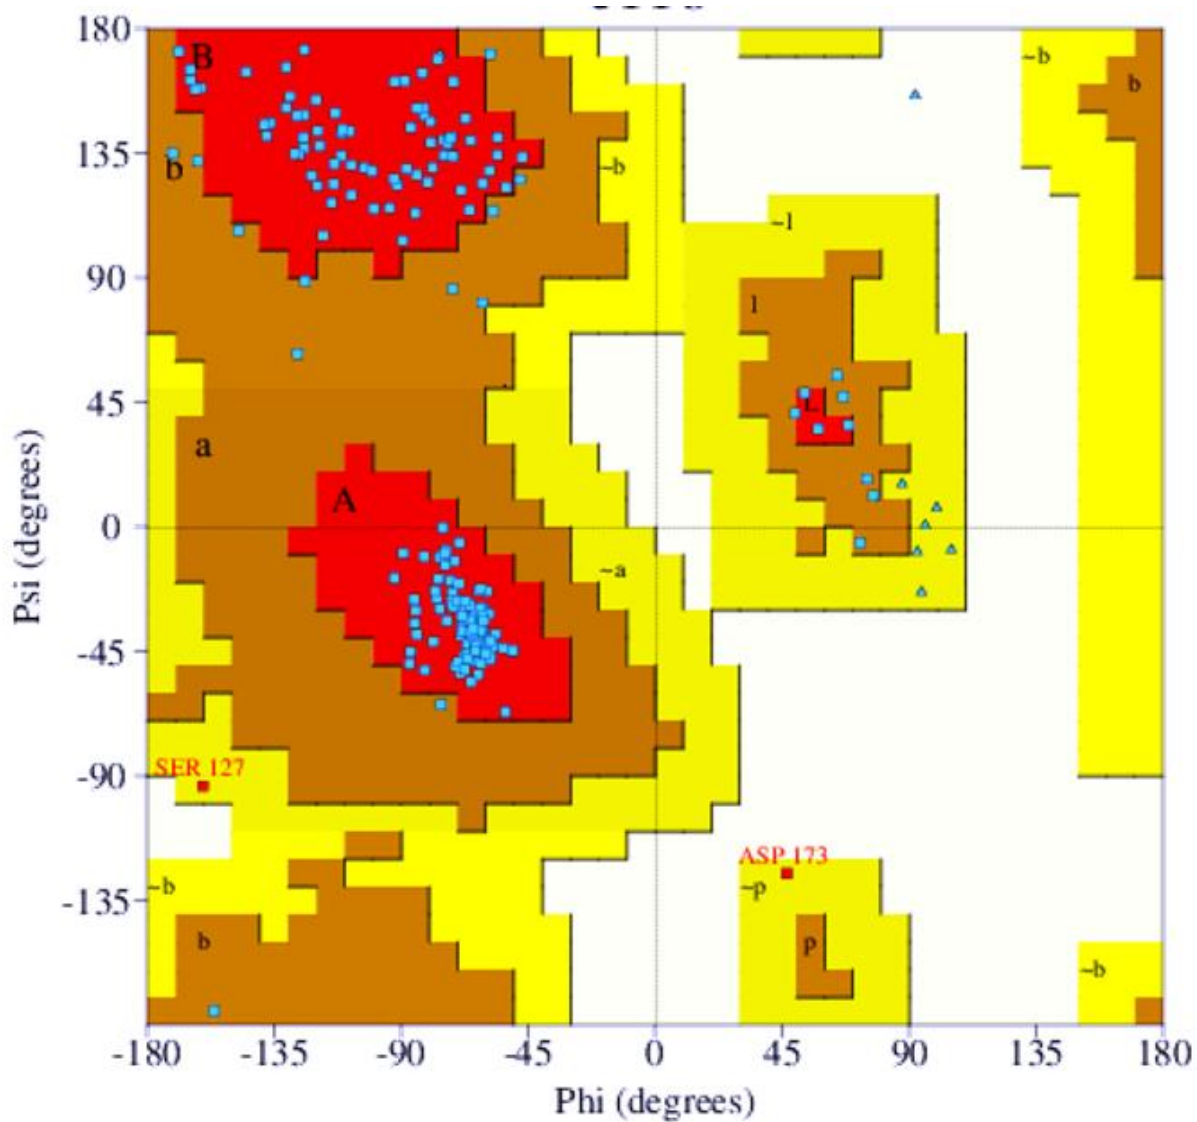

### Ramachandran Plot statistics

|                                          | No. of residues | %-tage |
|------------------------------------------|-----------------|--------|
| Most favored regions [A,B,L]             | 191             | 91.0%  |
| Additional allowed regions [a,b,l,p]     | 17              | 8.1%   |
| Generously allowed regions [~a,~b,~l,~p] | 2               | 1.0%   |
| Disallowed regions [XX]                  | 0               | 0.0%   |
| Non-glycine and non-proline residues     | 210             | 100.0% |
| End-residues (excl. Gly and Pro)         | 2               |        |
| Glycine residues                         | 8               |        |
| Proline residues                         | 15              |        |
| Total number of residues                 | 235             |        |

**Supplementary Figure S3 (B).** Ramachandran plot of Subunit B



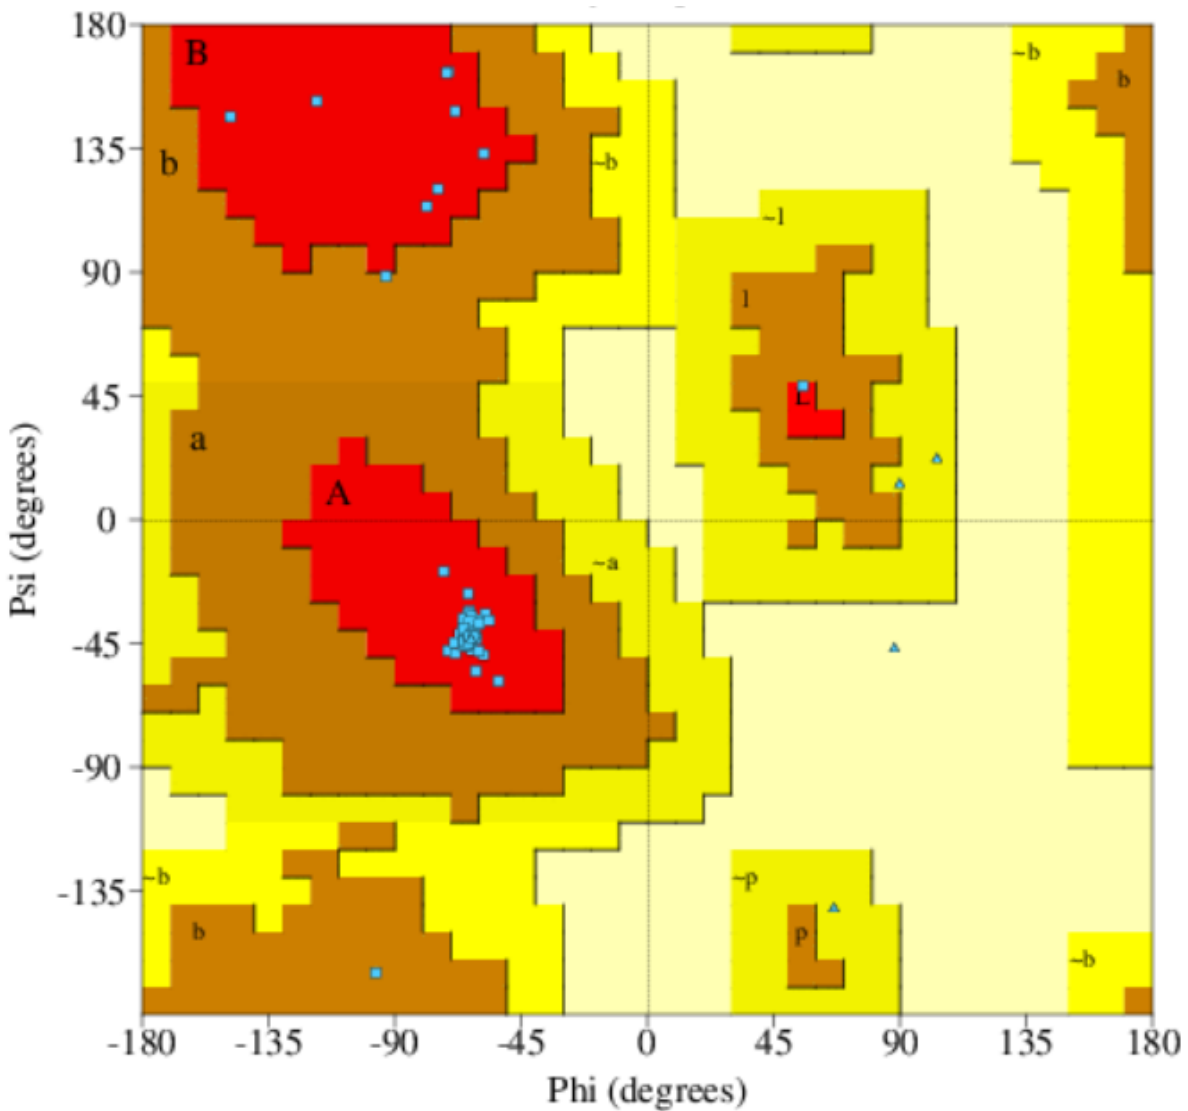

### Ramachandran Plot statistics

|                                          | No. of residues | %-tage |
|------------------------------------------|-----------------|--------|
| Most favored regions [A,B,L]             | 78              | 97.5%  |
| Additional allowed regions [a,b,l,p]     | 2               | 2.5%   |
| Generously allowed regions [~a,~b,~l,~p] | 0               | 0.0%   |
| Disallowed regions [XX]                  | 0               | 0.0%   |
| Non-glycine and non-proline residues     | 80              | 100.0% |
| End-residues (excl. Gly and Pro)         | 2               |        |
| Glycine residues                         | 9               |        |
| Proline residues                         | 3               |        |
| Total number of residues                 | 94              |        |

**Supplementary Figure S3 (C).** Ramachandran plot of Subunit C

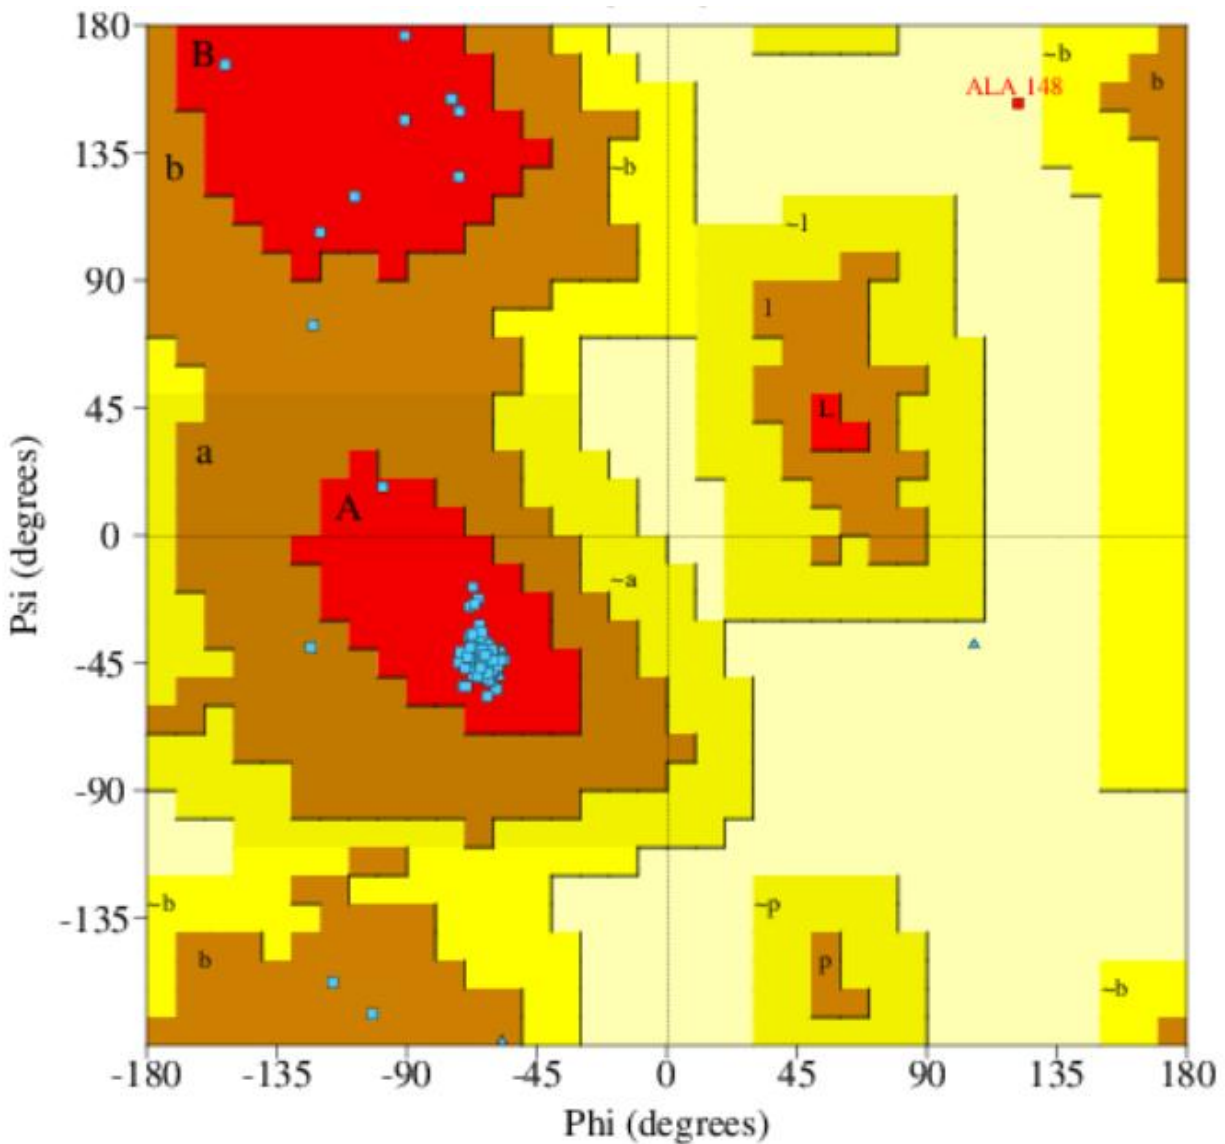

#### Ramachandran Plot statistics

|                                          | No. of residues | %-tage |
|------------------------------------------|-----------------|--------|
| Most favoured regions [A,B,L]            | 81              | 94.2%  |
| Additional allowed regions [a,b,l,p]     | 4               | 4.7%   |
| Generously allowed regions [~a,~b,~l,~p] | 0               | 0.0%   |
| Disallowed regions [XX]                  | 1               | 1.2%*  |
| Non-glycine and non-proline residues     | 86              | 100.0% |
| End-residues (excl. Gly and Pro)         | 2               |        |
| Glycine residues                         | 7               |        |
| Proline residues                         | 6               |        |
| Total number of residues                 | 101             |        |

**Supplementary Figure S3 (D).** Ramachandran plot of Subunit D

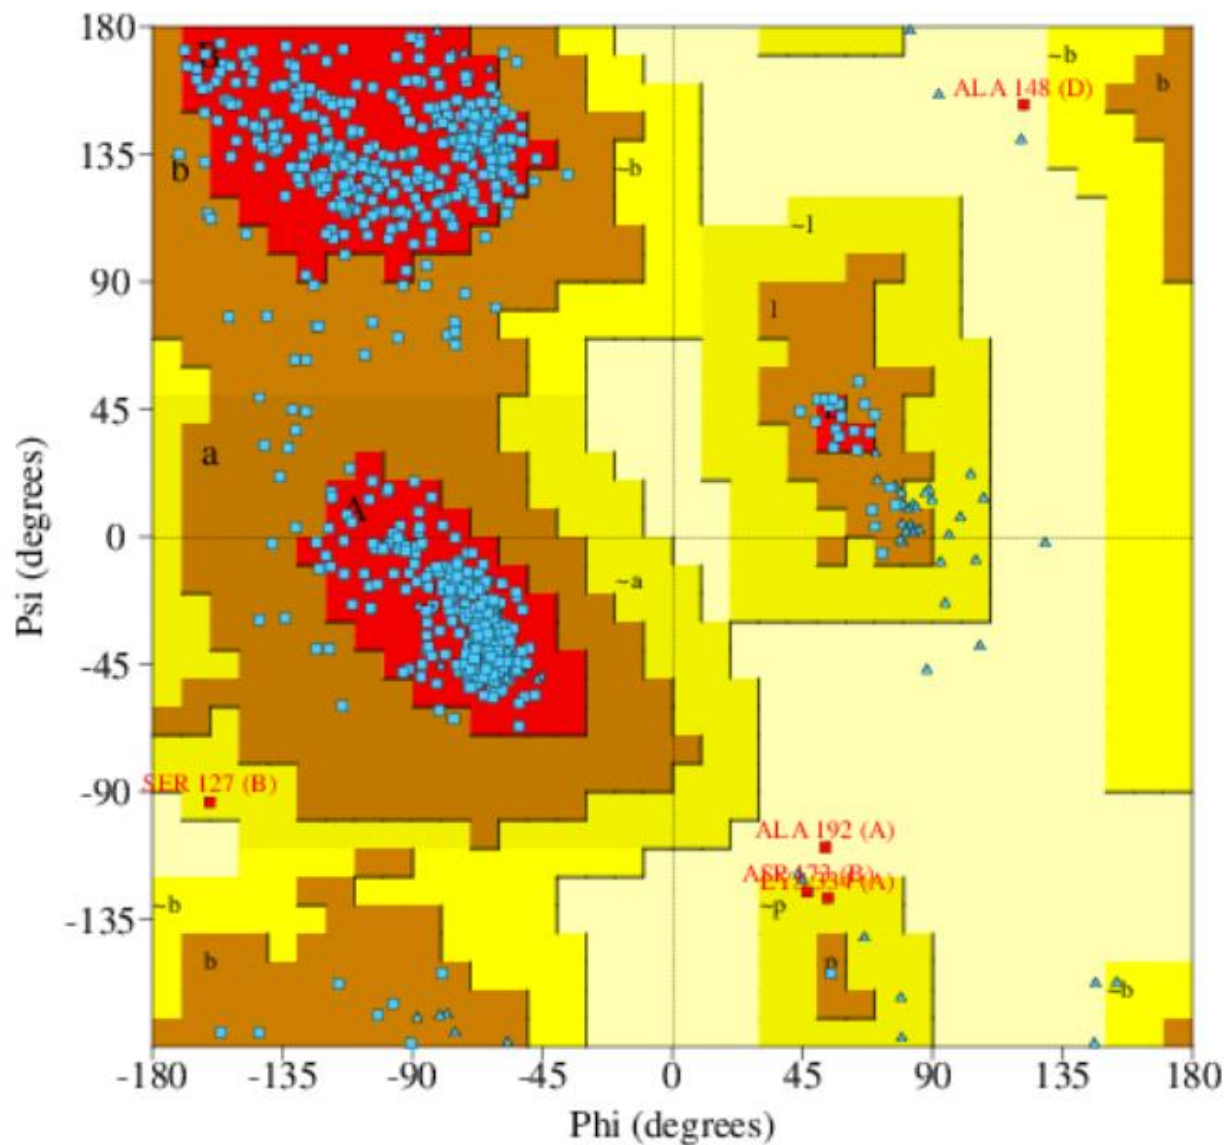

#### Ramachandran Plot statistics

|                                          | No. of residues | %-tage |
|------------------------------------------|-----------------|--------|
| Most favoured regions [A,B,L]            | 821             | 92.0%  |
| Additional allowed regions [a,b,l,p]     | 66              | 7.4%   |
| Generously allowed regions [~a,~b,~l,~p] | 3               | 0.3%   |
| Disallowed regions [XX]                  | 2               | 0.2%*  |
| Non-glycine and non-proline residues     | 892             | 100.0% |
| End-residues (excl. Gly and Pro)         | 7               |        |
| Glycine residues                         | 85              |        |
| Proline residues                         | 46              |        |
| Total number of residues                 | 1030            |        |

**Supplementary Figure S3 (E).** Ramachandran plot of complete model of SDH

Program: ERRAT2  
File: /var/www/SAVES/Jobs/2076096//errrat.pdb  
Chain#:1  
Overall quality factor\*\*: 82.010

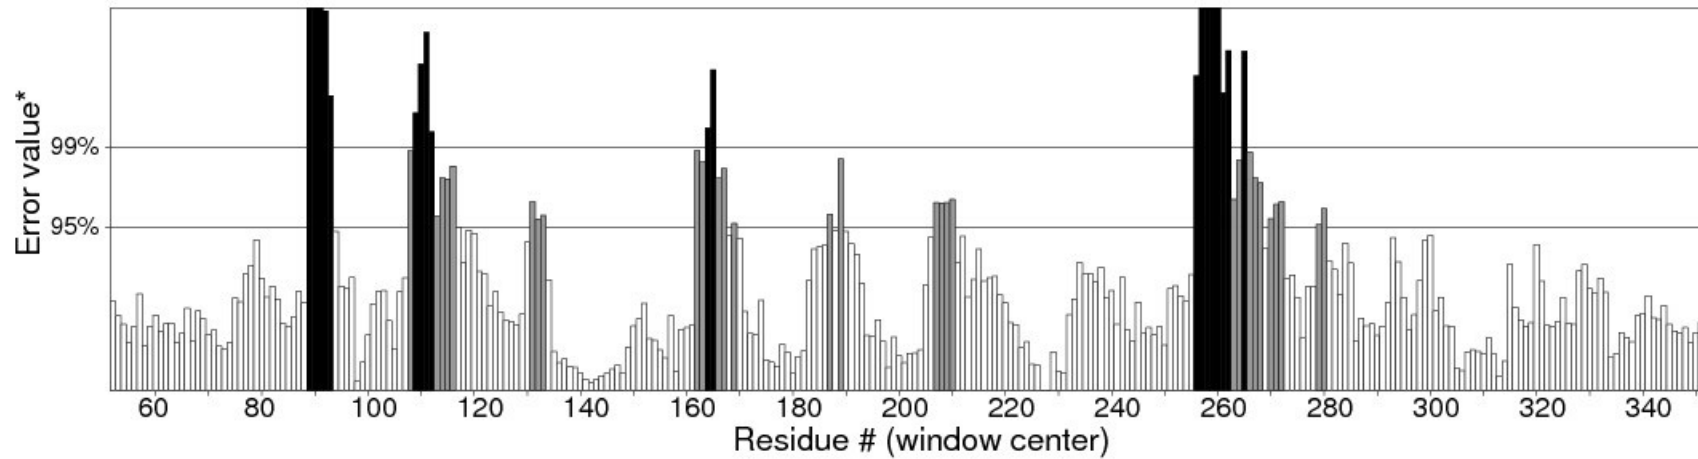

\*On the error axis, two lines are drawn to indicate the confidence with which it is possible to reject regions that exceed that error value.

\*\*Expressed as the percentage of the protein for which the calculated error value falls below the 95% rejection limit. Good high resolution structures generally produce values around 95% or higher. For lower resolutions (2.5 to 3Å) the average overall quality factor is around 91%.

**Supplementary Figure S4.** ERRAT scores for the *A. solani* SDH model

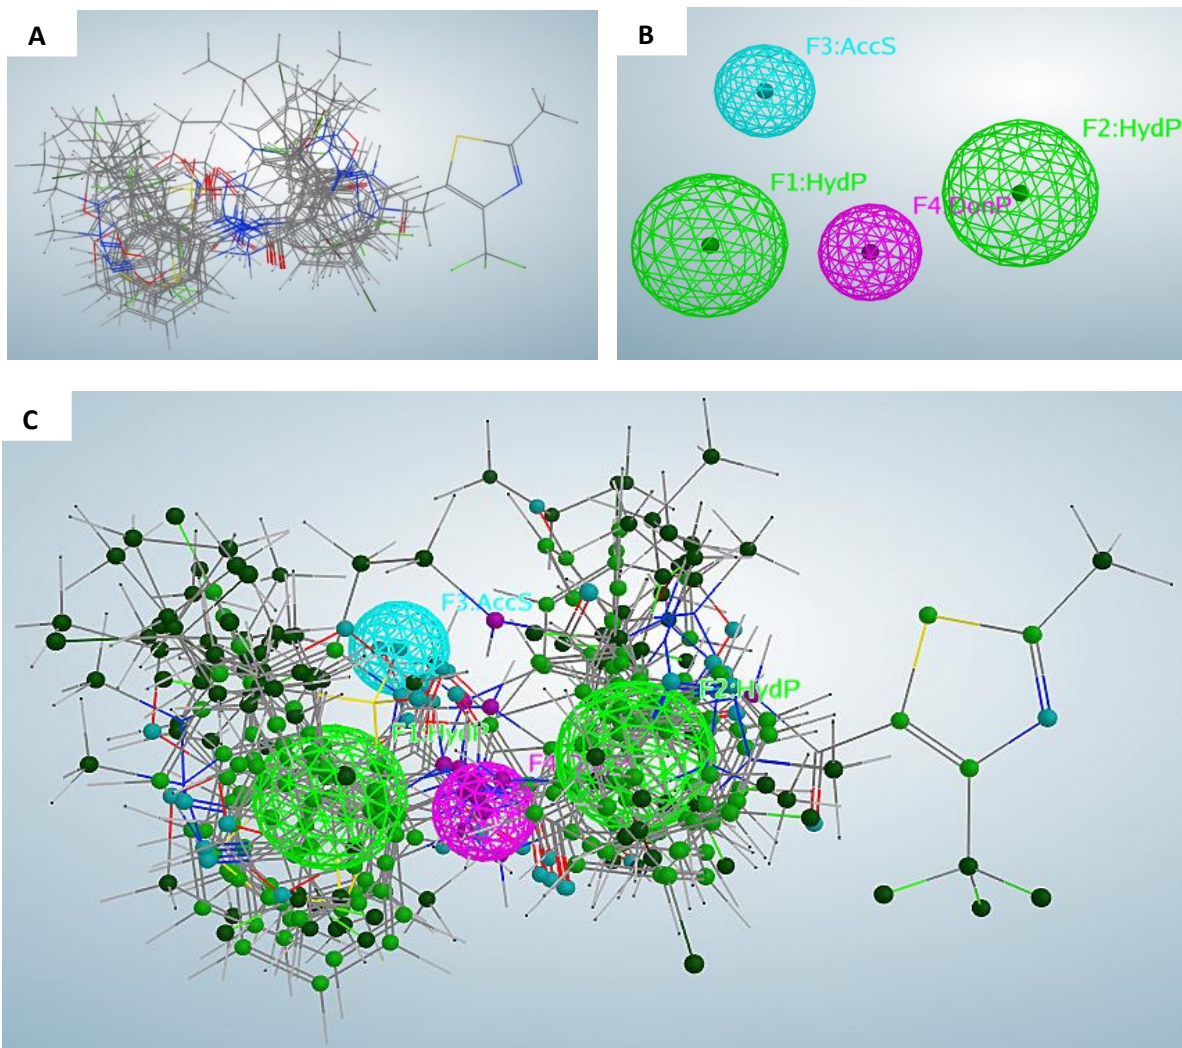

**Supplementary Figure S5.** (A) Superimposed view of 18 Fungicides (SDH inhibitors). The pharmacophoric features H-bond acceptor, H-bond donor, and Hydrophobic features are depicted in light blue, pink, and Green spheres, respectively (C) Superimposed view of 18 fungicides on the pharmacophore model.

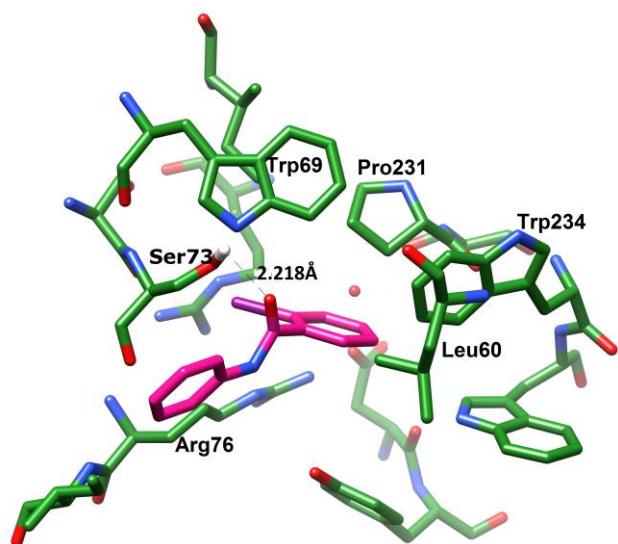

**Benodanil**

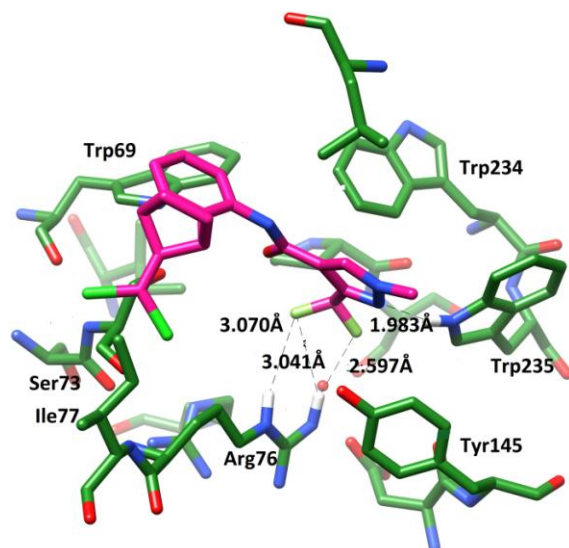

**Benzovindiflupyr**

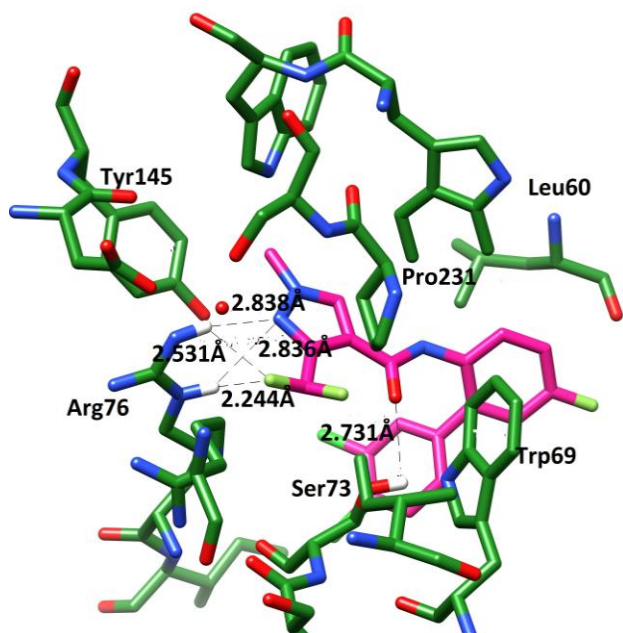

**Bixafen**

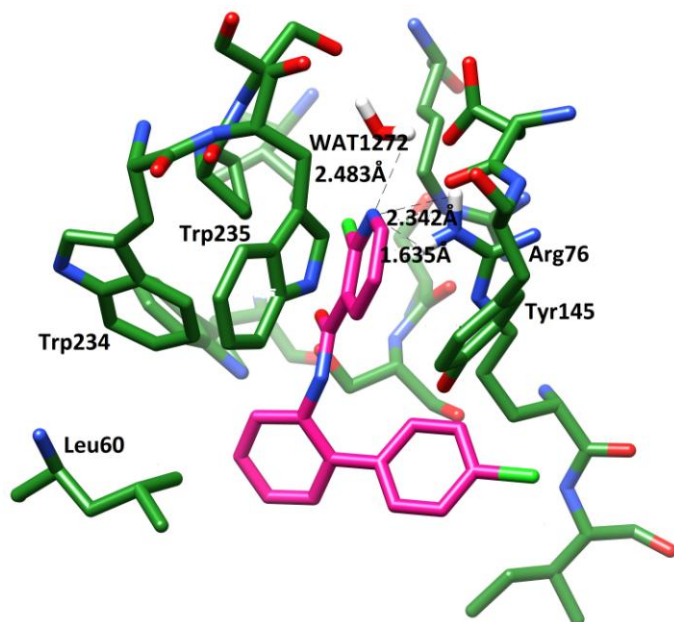

**Boscalid**

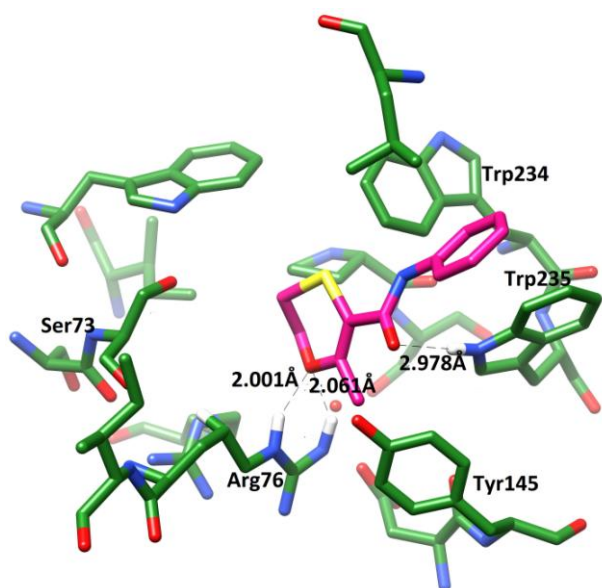

**Carboxin**

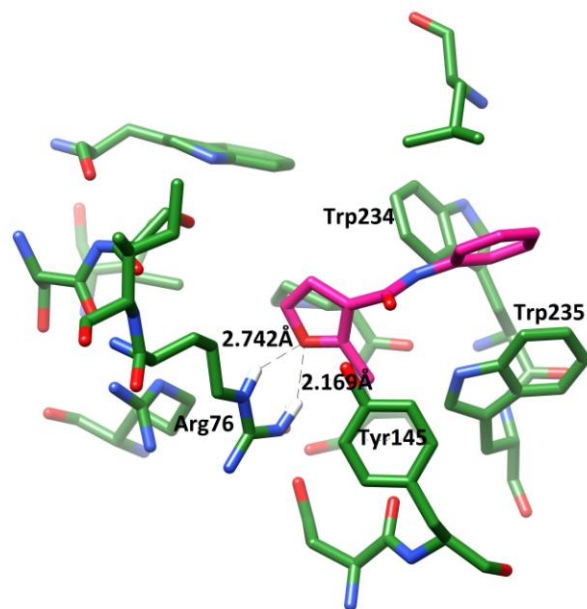

**Fenfuram**

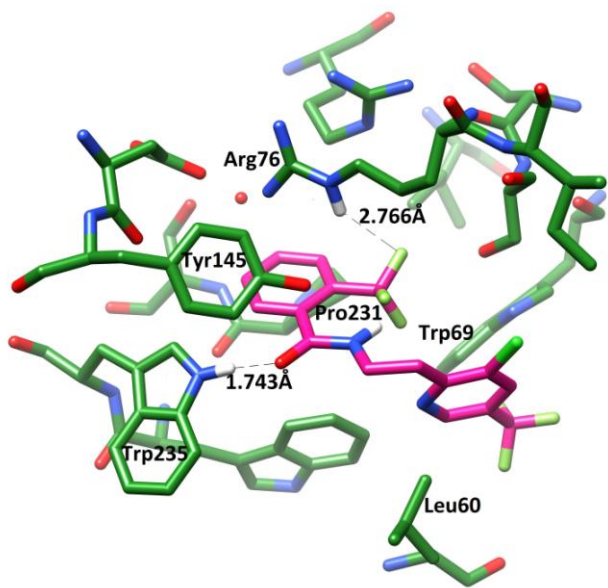

**Fluopyram**

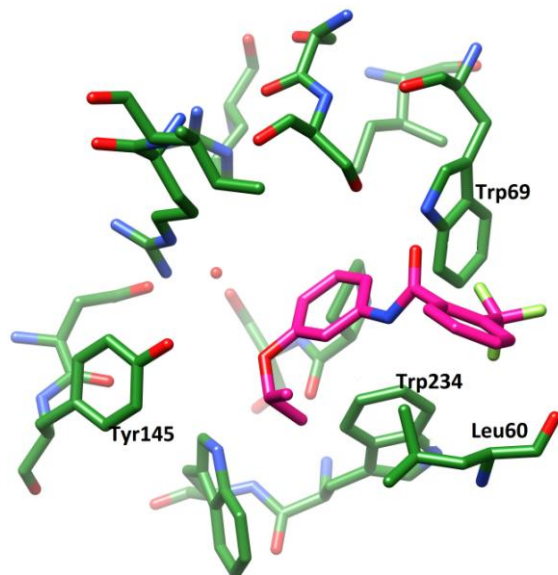

**Flutolanil**

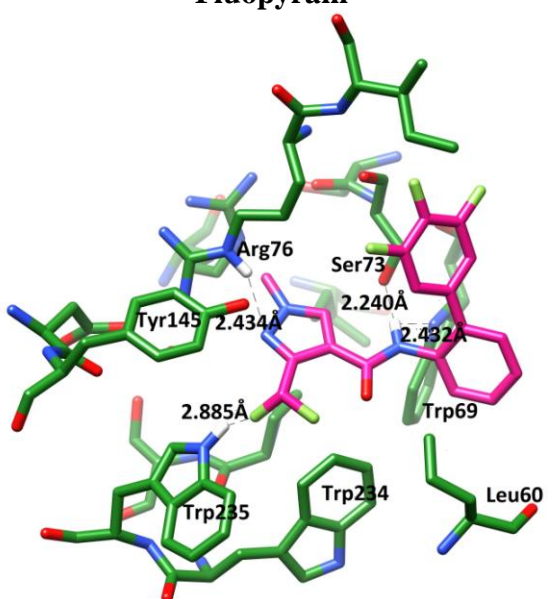

**Fluxapyroxad**

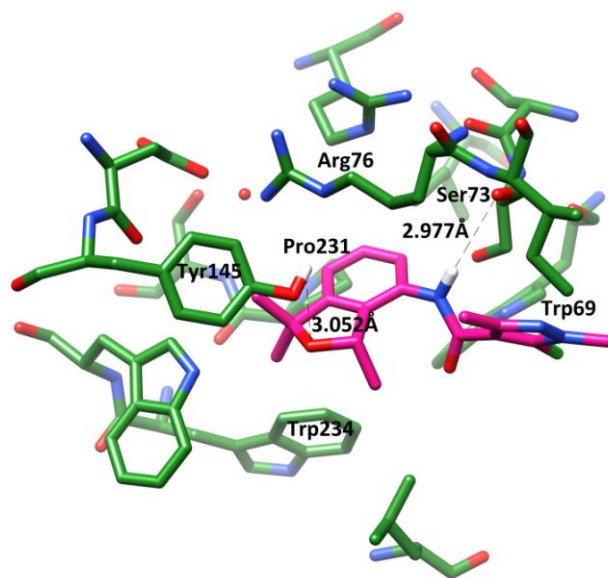

**Furametpyr**

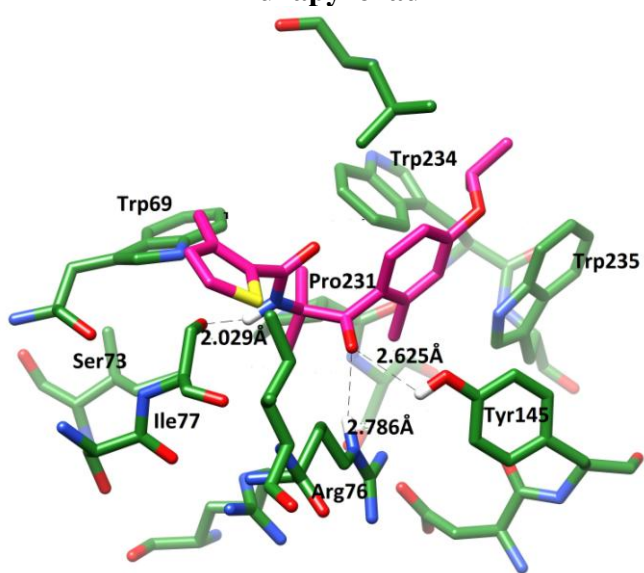

**Isofetamid**

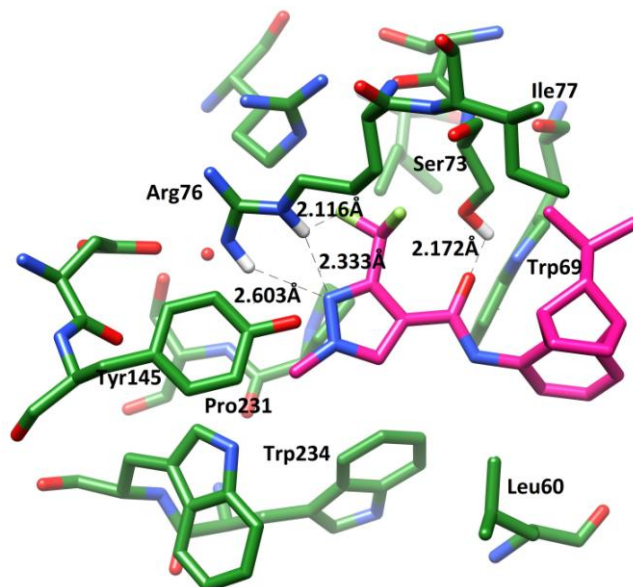

**Isopyrazam**

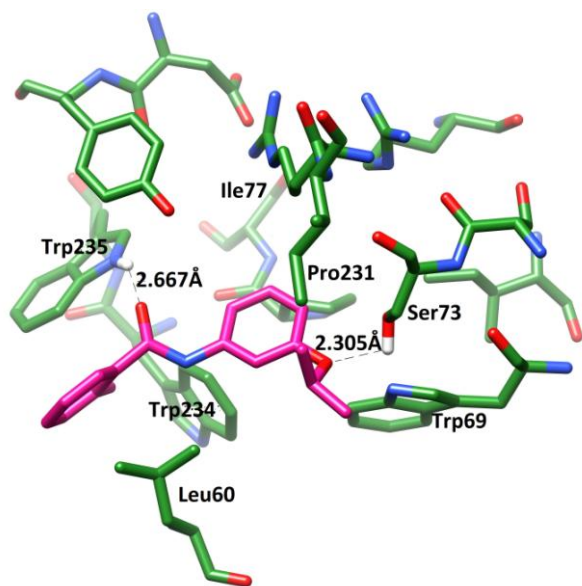

**Mepronil**

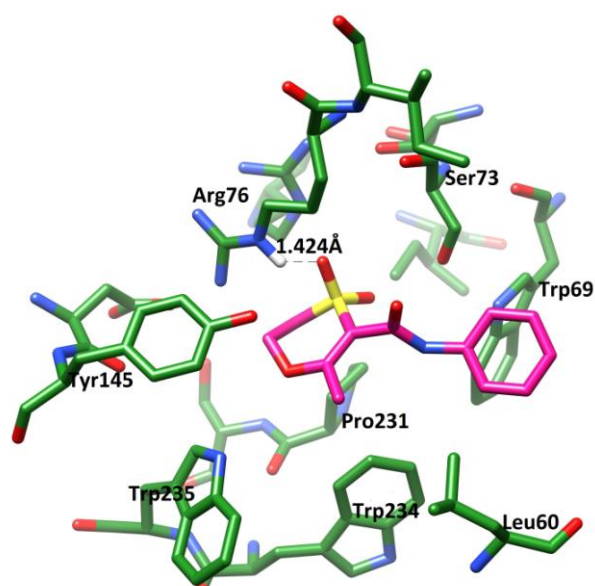

**Oxycarboxin**

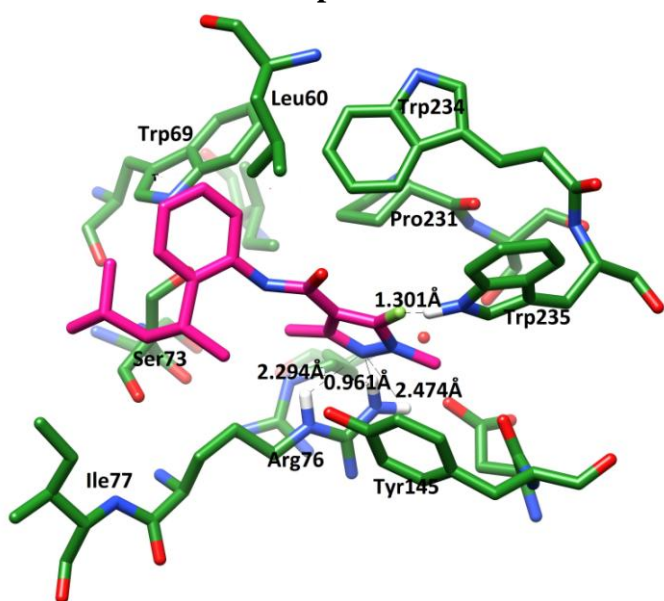

**Penflufen**

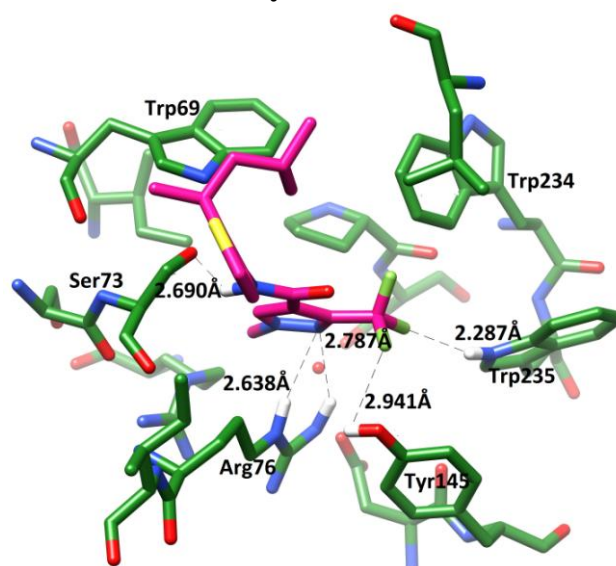

**Penthiopyrad**

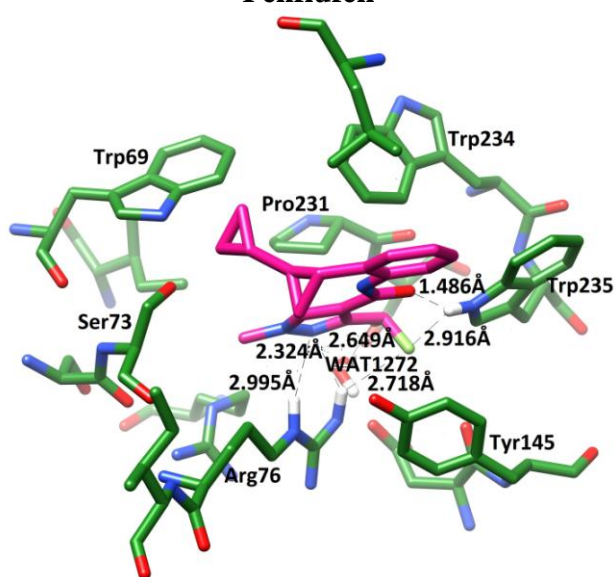

**Sedaxane**

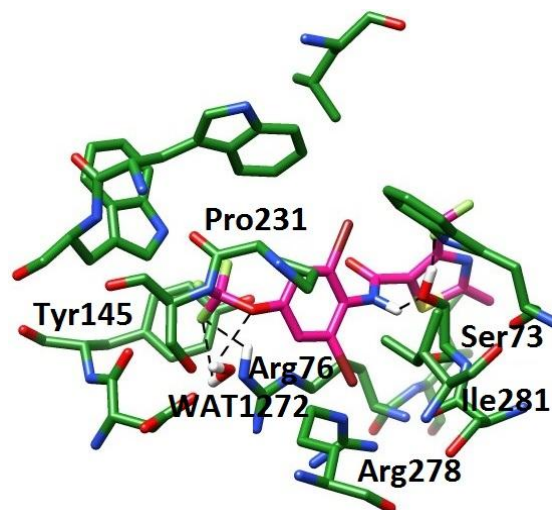

**Thifluzamide**

**Supplementary Figure S6.** The binding modes of 18 known SDHIs. The interacting residues are depicted in green stick and compounds in pink color. H-bonds are displayed in black dash lines.



## 1.1 Supplementary Tables

**Supplementary Table S1.** Percent identities between *A. solani* SDHs and template sequences

| Subunit      | Identity | PDB code | Organism                             | Protein name                                              |
|--------------|----------|----------|--------------------------------------|-----------------------------------------------------------|
| <b>SDH A</b> | 69%      | 1YQ3     | <i>Gallus gallus</i>                 | Succinate dehydrogenase                                   |
|              | 69%      | 1ZOY     | <i>Sus scrofa</i>                    | Succinate:ubiquinoneoxidoreductase                        |
|              | 69%      | 4YTP     | <i>Sus scrofa</i>                    | Succinate dehydrogenase                                   |
|              | 62%      | 3VR8     | <i>Ascarissuum</i>                   | Mitochondrial quinol-fumarate reductase                   |
|              | 62%      | 4YSX     | <i>Ascaris suum</i>                  | Succinate dehydrogenase                                   |
|              | 55%      | 1NEK     | <i>Escherichia coli</i>              | Succinate dehydrogenase                                   |
| <b>SDH B</b> | 69%      | 1YQ3     | <i>Gallus gallus</i>                 | Succinate dehydrogenase                                   |
|              | 67%      | 3ABV     | <i>Sus scrofa</i>                    | Succinate dehydrogenase                                   |
|              | 67%      | 1ZOY     | <i>Sus scrofa</i>                    | Succinate:ubiquinoneoxidoreductase                        |
|              | 66%      | 3VR8     | <i>Ascarissuum</i>                   | Quinol-fumarate reductase                                 |
|              | 53%      | 1NEK     | <i>Escherichia coli</i>              | Succinate dehydrogenase                                   |
| <b>SDH C</b> | 37%      | 1ZOY     | <i>Susscrofa</i>                     | Succinate:ubiquinoneoxidoreductase                        |
|              | 37%      | 2H88     | <i>Gallus gallus</i>                 | Succinate dehydrogenase                                   |
|              | 37%      | 1YQ3     | <i>Gallus gallus</i>                 | Succinate dehydrogenase                                   |
|              | 37%      | 2FLQ     | <i>Geobacillusstearothermophilus</i> | Nitric Oxide Synthase                                     |
|              | 36%      | 2FBW     | <i>Gallus gallus</i>                 | Succinate dehydrogenase                                   |
|              | 34%      | 1MJT     | <i>Staphylococcus aureus</i>         | Nitric-oxide synthase                                     |
|              | 33%      | 2Y5B     | <i>Homo sapiens</i>                  | Ubiquitin carboxyl-terminal hydrolase                     |
|              | 33%      | 3I3T     | <i>Homo sapiens</i>                  | Ubiquitin carboxyl-terminal hydrolase                     |
|              | 33%      | 3MTN     | <i>Homo sapiens</i>                  | Ubiquitin carboxyl-terminal hydrolase                     |
|              | 31%      | 3VR8     | <i>Ascarissuum</i>                   | Quinol-fumarate reductase                                 |
| <b>SDH D</b> | 42%      | 2EOB     | <i>Rattusnorvegicus</i>              | 1-phosphatidylinositol-4,5-bisphosphate phosphodiesterase |
|              | 36%      | 1ZOY     | <i>Susscrofa</i>                     | Succinate:ubiquinoneoxidoreductase                        |
|              | 35%      | 1YQ3     | <i>Gallus gallus</i>                 | Succinate dehydrogenase                                   |
|              | 33%      | 1NP7     | <i>Synechocystissp</i>               | DNA photolyase                                            |
|              | 31%      | 2JFK     | <i>Homo sapiens</i>                  | Fatty acid synthase                                       |
|              | 31%      | 2JFD     | <i>Homo sapiens</i>                  | Fatty acid synthase                                       |
|              | 31%      | 3HHD     | <i>Homo sapiens</i>                  | Fatty acid synthase                                       |

**Supplementary Table S2.** Chemical structure and Docking Scores of 18 known SDHIs (fungicides).

| Sr. | Name         | Chemical structure                                                                  | Docking Scores | Sr. | Name             | Chemical structure                                                                    | Docking Scores |
|-----|--------------|-------------------------------------------------------------------------------------|----------------|-----|------------------|---------------------------------------------------------------------------------------|----------------|
| 1   | Benodanil    | 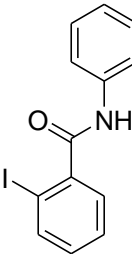   | -9.45          | 2   | Benzovindiflupyr |    | -9.69          |
| 3   | Bixafen      |    | -9.87          | 4   | Boscalid         |    | -10.47         |
| 5   | Carboxin     |    | -10.24         | 6   | Fenfuram         |   | -9.02          |
| 7   | Fluopyram    |  | -10.02         | 8   | Flutolanil       |  | -9.74          |
| 9   | Fluxapyroxad |  | -9.96          | 10  | Furametpyr       |  | -10.63         |
| 11  | Isofetamid   |  | -10.46         | 12  | Isopyrazam       |  | -9.57          |

|    |           |                                                                                   |        |    |              |                                                                                     |        |
|----|-----------|-----------------------------------------------------------------------------------|--------|----|--------------|-------------------------------------------------------------------------------------|--------|
| 13 | Mepronil  | 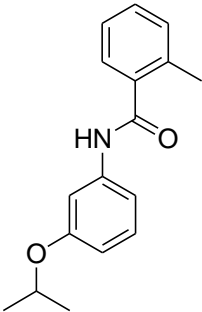 | -10.51 | 14 | Oxycarboxin  |  | -11.07 |
| 15 | Penflufen |  | -9.56  | 16 | Penthiopyrad |  | -9.46  |
| 17 | Sedaxane  |  | -10.13 | 18 | Thifluzamide |  | -11.67 |

**Supplementary Table S3.** Chemical Structures and Docking Score of 25 compounds selected from ZINC database after docking, rescoring and interaction analysis

| No. | ZINC ID      | Compound Code | Structure                                                                            | ADT Score | MOE Score |
|-----|--------------|---------------|--------------------------------------------------------------------------------------|-----------|-----------|
| 1   | ZINC00781454 | C1            | 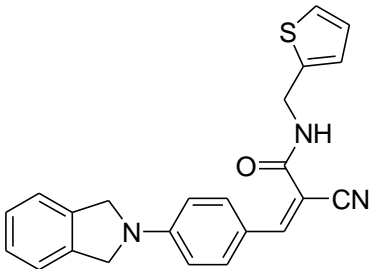   | -8.74     | -5.2243   |
| 2   | ZINC13037761 | ---           |    | -8.25     | -5.7331   |
| 3   | ZINC78502784 | ---           |   | -8.23     | -5.2939   |
| 4   | ZINC19837471 | ---           |  | -8.22     | -5.2954   |
| 5   | ZINC50812116 | ---           |  | -8.20     | -4.4908   |

|    |              |     |                                                                                      |       |         |
|----|--------------|-----|--------------------------------------------------------------------------------------|-------|---------|
| 6  | ZINC04498541 | C2  | 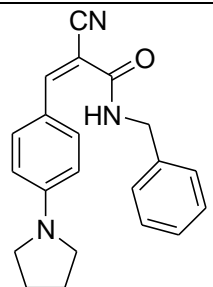    | -8.20 | -5.2388 |
| 7  | ZINC34378628 | C12 |    | -8.18 | -5.1025 |
| 8  | ZINC27260697 | C3  |    | -8.10 | -4.1538 |
| 9  | ZINC00795936 | --- |   | -8.00 | -5.2242 |
| 10 | ZINC32180696 | C11 |  | -8.00 | -4.6726 |
| 11 | ZINC36624363 | --- |  | -8.00 | -4.6285 |

|    |              |            |                                                                                      |       |          |
|----|--------------|------------|--------------------------------------------------------------------------------------|-------|----------|
| 12 | ZINC17007371 | <b>C10</b> | 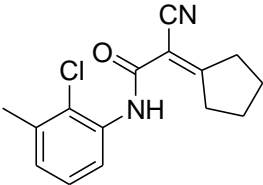   | -7.98 | -4.4015  |
| 13 | ZINC06512448 | <b>C9</b>  |    | -7.93 | -4.8394  |
| 14 | ZINC04731427 | ---        |    | -7.87 | -5.0271  |
| 15 | ZINC32803988 | ---        |   | -7.85 | -4.3761  |
| 16 | ZINC02409017 | <b>C4</b>  |  | -7.74 | -4.5404  |
| 17 | ZINC03102709 | <b>C6</b>  |  | -7.74 | -4.95920 |

|    |              |     |                                                                                      |       |         |
|----|--------------|-----|--------------------------------------------------------------------------------------|-------|---------|
| 18 | ZINC06183077 | C8  | 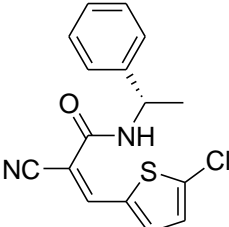   | -7.69 | -3.4910 |
| 19 | ZINC00689200 | C5  |    | -7.68 | -3.7313 |
| 20 | ZINC01436920 | --- |    | -7.68 | -4.9843 |
| 21 | ZINC18046772 | --- |   | -7.66 | -4.4454 |
| 22 | ZINC04903387 | --- |  | -7.63 | -5.2351 |

|    |              |     |                                                                                     |       |         |
|----|--------------|-----|-------------------------------------------------------------------------------------|-------|---------|
| 23 | ZINC05176439 | C7  | 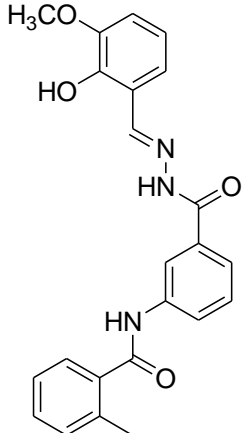  | -7.61 | -4.3706 |
| 24 | ZINC00707182 | --- |   | -7.6  | -3.5623 |
| 25 | ZINC12196415 | --- |  | -7.60 | -4.3058 |
